# Supplementary material for: Preparation and Thermal Characterization of Hollow Graphite Fibers/Paraffin Composite Phase Change Material
Source: MDPI journal article supplement (doi:10.3390/coatings12020160), 2022-01-27
Supplement: s1 [file s1]

# Supplementary Materials: Preparation and Thermal Characterization of Hollow Graphite Fibers/Paraffin Composite Phase Change Material

Liyong Wang <sup>1</sup>, Zhanjun Liu <sup>2,3,\*</sup>, Quangui Guo <sup>2,3,\*</sup>, Huiqi Wang <sup>1,\*</sup>, Xianglei Wang <sup>4</sup>, Xiaozhong Dong <sup>5</sup>, Xiaodong Tian <sup>2</sup> and Xiaohui Guo <sup>2</sup>

<sup>1</sup> School of Energy and Power Engineering, North University of China, Taiyuan 030001, China; nucc@nuc.edu.cn

<sup>2</sup> CAS Key Laboratory of Carbon Materials, Institute of Coal Chemistry, Chinese Academy of Sciences, Taiyuan 030001, China; tianxiaodong@sxicc.ac.cn (X.T.); guoxh@sxicc.ac.cn (X.G.)

<sup>3</sup> Center of Materials Science and Optoelectronics Engineering, University of Chinese Academy of Sciences, Beijing 100049, China

<sup>4</sup> Department of Chemical Engineering, Ordos Institute of Technology, Ordos 017000, China; wxl19830403@aliyun.com

<sup>5</sup> Department of Materials Engineering, Taiyuan Institute of Technology, Taiyuan 030001, China; dongxzsx@163.com

\* Correspondence: zjliu03@sxicc.ac.cn (Z.L.); qgguo@sxicc.ac.cn (Q.G.); hqiwang@nuc.edu.cn (H.W.)

**Table S1.** The thermal physical data of the composites.

| NO. | $\alpha$ (m <sup>2</sup> /s) | $C_p$ (j/gk) | $\rho$ (g/cm <sup>3</sup> ) |
|-----|------------------------------|--------------|-----------------------------|
| 1   | 0.7532(//)<br>0.2075(⊥)      | 2.503        | 0.8059                      |
| 2   | 0.9212 (//)<br>0.2094(⊥)     | 2.583        | 0.832                       |
| 3   | 1.056(//)<br>0.3747(⊥)       | 2.674        | 0.887                       |

The “//” means along the axial direction of the fiber, and “⊥” means the along the radial direction of the fiber.
